# Supplementary material
Source: PubMed Central journal article supplement (PMC5021600)
Supplement: NIHMS809315-supplement-Supplemental_Material.pdf [file NIHMS809315-supplement-Supplemental_Material.pdf]

## SUPPLEMENTAL MATERIAL

### Development and Validation of a Sudden Cardiac Death Prediction Model for the General Population

Rajat Deo, MD, MTR<sup>1</sup>; Faye L. Norby, MS, MPH<sup>2</sup>; Ronit Katz, DPhil<sup>3</sup>; Nona Sotoodehnia, MD, MPH<sup>4</sup>; Selcuk Adabag, MD, MS<sup>5</sup>; Christopher R. DeFilippi, MD<sup>6</sup>; Bryan Kestenbaum, MD, MS<sup>3,7</sup>; Lin Y. Chen, MD, MS<sup>8</sup>; Susan R. Heckbert, MD, PhD<sup>9</sup>; Aaron R. Folsom, MD, MPH<sup>2</sup>; Richard A. Kronmal, PhD<sup>3,10</sup>; Suma Konety, MD, MS<sup>8</sup>; Kristen K. Patton, MD<sup>4</sup>; David Siscovick, MD, MPH<sup>11</sup>; Michael G. Shlipak, MD, MPH<sup>12</sup>; and Alvaro Alonso, MD, PhD<sup>13</sup>

<sup>1</sup>Section of Electrophysiology, Division of Cardiovascular Medicine, University of Pennsylvania, Philadelphia, Pennsylvania; <sup>2</sup>Division of Epidemiology and Community Health, School of Public Health, University of Minnesota, Minneapolis, Minnesota; <sup>3</sup>Kidney Research Institute, <sup>4</sup>Division of Cardiology, University of Washington, Seattle, Washington; <sup>5</sup>Division of Cardiology, Veterans Affairs Medical Center, Minneapolis, Minnesota; <sup>6</sup>Division of Cardiology, University of Maryland School of Medicine, Baltimore, Maryland; <sup>7</sup>Division of Nephrology, University of Washington, Seattle, Washington; <sup>8</sup>Division of Cardiology, University of Minnesota Medical School, Minneapolis, Minnesota; <sup>9</sup>Department of Epidemiology and Cardiovascular Health Research Unit, University of Washington, Seattle; <sup>10</sup>Department of Biostatistics, <sup>11</sup>The New York Academy of Medicine, New York; <sup>12</sup>General Internal Medicine Section, Veterans Affairs Medical Center, San Francisco, CA and Departments of Medicine, Epidemiology and Biostatistics, University of California, San Francisco, CA; and <sup>13</sup>Department of Epidemiology, Rollins School of Public Health, Emory University, Atlanta, GA

#### Address for Correspondence:

Rajat Deo, MD  
University of Pennsylvania  
3400 Spruce Street  
9 Founders Cardiology  
Philadelphia, PA 19104  
Phone: 215-615-5455  
Fax: 215-662-2879  
[Rajat.Deo@uphs.upenn.edu](mailto:Rajat.Deo@uphs.upenn.edu)

## Supplemental Methods

### Physical Activity

In ARIC, the level of physical activity was assessed at baseline using the sport index of the Baecke Questionnaire.<sup>1</sup> Sport activity scores range in whole and half increments from 1 – 5, with values <2 indicative of physical inactivity.<sup>2</sup>

In CHS, questionnaires were administered at baseline to estimate each participants' self-reported walking pace, exercise intensity, number of blocks walked weekly and leisure-time activity levels. During the baseline examination, participants were asked they had engaged in any of the following 15 leisure time activities in the prior 2 weeks: swimming, hiking, aerobics, tennis, jogging, racquetball, walking, gardening, mowing, raking, golfing, bicycling, dancing, calisthenics, and riding an exercise cycle. The intensity of each activity has been established and validated by the Minnesota Heart Survey.<sup>3</sup> Participant responses regarding each type of activity, frequency, and duration were used to calculate leisure time physical activity, expressed in kilocalories per week.

### Outcome Definitions

Myocardial infarction was defined by a clinical history of cardiac symptoms, elevated cardiac enzymes, and electrocardiographic changes.<sup>4,5</sup> In ARIC, incident heart failure was defined as the presence of an ICD code for heart failure (ICD 9 428, ICD 10 I50) in a hospitalization or death certificate.<sup>6</sup> In CHS, adjudication by the Events Committee required symptoms, signs, chest radiographic findings, and treatment of heart failure.<sup>4,7</sup> In both ARIC and CHS, cases of possible stroke were validated using established criteria and were based on interviews with patients, medical records, and brain imaging studies.<sup>4,8-10</sup> Death from cardiovascular causes in both cohorts was defined as death caused by coronary heart disease,

heart failure, or cerebrovascular disease. Cardiovascular deaths that were not considered to be cases of SCD comprised the non-SCD endpoint. All-cause mortality in ARIC and CHS was identified by a review of obituaries, follow-up calls, medical records, death certificates, and linkage to the National Death Index.

**Supplemental Table 1. Calibration metrics after recalibrating prediction models**

|                                        | ARIC           | CHS            |
|----------------------------------------|----------------|----------------|
| <b><u>Sudden Cardiac Death</u></b>     |                |                |
| SCD Prediction Score                   |                |                |
| Calibration chi-square (p-value)       | N/A            | 14.89 (0.094)  |
| ACC/AHA CVD risk equation              |                |                |
| Calibration chi-square (p-value)       | 11.47 (0.25)   | 17.98 (0.021)  |
| <b><u>Non-Sudden Cardiac Death</u></b> |                |                |
| SCD Prediction Score                   |                |                |
| Calibration chi-square (p-value)       | 9.05 (0.43)    | 43.58 (<0.001) |
| ACC/AHA CVD risk equation              |                |                |
| Calibration chi-square (p-value)       | 28.20 (0.001)  | 21.69 (0.010)  |
| <b><u>All-Cause Mortality</u></b>      |                |                |
| SCD Prediction Score                   |                |                |
| Calibration chi-square (p-value)       | 90.16 (<0.001) | 71.47 (<0.001) |
| ACC/AHA CVD risk equation              |                |                |
| Calibration chi-square (p-value)       | 34.54 (<0.001) | 24.16 (0.0022) |

### Supplemental References

1. Baecke JA, Burema J, Frijters JE. A short questionnaire for the measurement of habitual physical activity in epidemiological studies. *Am J Clin Nutr.* 1982;36:936-942.
2. Meyer AM, Evenson KR, Couper DJ, Stevens J, Pereria MA, Heiss G. Television, physical activity, diet, and body weight status: the ARIC cohort. *Int J Behav Nutr Phys Act.* 2008;5:1-14.
3. Taylor HL, Jacobs DR, Jr., Schucker B, Knudsen J, Leon AS, Debacker G. A questionnaire for the assessment of leisure time physical activities. *J Chronic Dis.* 1978;31:741-755.
4. Ives DG, Fitzpatrick AL, Bild DE, Psaty BM, Kuller LH, Crowley PM, Cruise RG, Theroux S. Surveillance and ascertainment of cardiovascular events. The Cardiovascular Health Study. *Ann Epidemiol.* 1995;5:278-285.
5. Beddhu S, Nigwekar SU, Ma X, Greene T. Associations of resting heart rate with insulin resistance, cardiovascular events and mortality in chronic kidney disease. *Nephrol Dial Transplant.* 2009;24:2482-2488.
6. Loehr LR, Rosamond WD, Chang PP, Folsom AR, Chambless LE. Heart failure incidence and survival (from the Atherosclerosis Risk in Communities study). *Am J Cardiol.* 2008;101:1016-1022.
7. Gottdiener JS, Arnold AM, Aurigemma GP, Polak JF, Tracy RP, Kitzman DW, Gardin JM, Rutledge JE, Boineau RC. Predictors of congestive heart failure in the elderly: the Cardiovascular Health Study. *J Am Coll Cardiol.* 2000;35:1628-1637.
8. White AD, Folsom AR, Chambless LE, Sharret AR, Yang K, Conwill D, Higgins M, Williams OD, Tyroler HA. Community surveillance of coronary heart disease in the Atherosclerosis Risk in Communities (ARIC) Study: methods and initial two years' experience. *J Clin Epidemiol.* 1996;49:223-233.

9. Rosamond WD, Folsom AR, Chambless LE, Wang CH, McGovern PG, Howard G, Copper LS, Shahar E. Stroke incidence and survival among middle-aged adults: 9-year follow-up of the Atherosclerosis Risk in Communities (ARIC) cohort. *Stroke*. 1999;30:736-743.
10. Price TR, Psaty B, O'Leary D, Burke G, Gardin J. Assessment of cerebrovascular disease in the Cardiovascular Health Study. *Ann Epidemiol*. 1993;3:504-507.
